# Supplementary material
Source: publisher figshare collection journal article supplement (https://karger.figshare.com/ndownloader/files/23181692)
Supplement: Supplementary file 1 [file 23181692]

Supplementary Table 1: Characteristics of ‘high’ (≥35ml/m2) versus ‘low’ (<35ml/m2) LAVi in ESUS

| **Variable** | **High LAVi (n=39)** | **Low LAVi (n=146)** | **Odds Ratio/Mean Difference (CI 95%)** | **p-value** |
| --- | --- | --- | --- | --- |
| Age (years) | 65.4 (±11.9) | 62.4 (±12.3) | 3.04 (-1.35 – 7.43) | 0.17 |
| Male (n, %) | 21 (53.8) | 111 (76.0) | 0.47 (0.27 – 0.81) | **0.006** |
| Co-morbidities (n, %)  Hypertension  Diabetes mellitus  Dyslipidemia  Ischemic heart disease  Heart failure  Previous stroke/TIA | 36 (92.3)  16 (41.0)  22 (56.4)  10 (25.6)  1 (2.6)  11 (28.2) | 102 (69.9)  49 (33.6)  82 (56.2)  24 (16.4)  6 (4.1)  21 (14.4) | 5.18 (1.51 – 17.71)  1.38 (0.67 – 2.84)  1.01 (0.50 – 2.06)  1.75 (0.76 – 4.07)  0.61 (0.07 – 5.26)  2.34 (1.01 – 5.40) | **0.004**  0.39  0.98  0.19  1.00  **0.043** |
| Laboratory findings  eGFR (ml/min; N: >60)  Fasting glucose (mmol/L)  HbA1c (%)  LDL-c (mmol/L) | 78.3 (±21.6)  6.0 (±1.3)  6.8 (±2.4)  2.7 (±0.9) | 83.2 (±24.1)  6.6 (±2.5)  6.6 (±1.9)  3.1 (±1.2) | -4.9 (-13.7 – 3.9)  -0.6 (-1.6 – 0.4)  0.1 (-0.7 – 0.9)  -0.4 (-0.8 – 0.04) | 0.27  0.24  0.76  0.08 |
| Multiple vascular territory of infarct (n, %) | 13 (33.3) | 21 (14.5) | 2.95 (1.31 – 6.64) | **0.007** |
| Prolonged cardiac monitoring with ICM (n, %) | 16 (41.0) | 54 (37.0) | 1.19 (0.58 – 2.44) | 0.64 |
| Echocardiographic parameters  LVEF 30-50% (n, %)  LA volume (ml)  LA volume index (ml/m2)  LA diameter (mm)  LA diameter index (mm/m2)  LVEDVi (ml/m2)  LVMi (g/m2) | 8 (20.5)  72.5 (±15.8)  43.4 (± 7.4)  42.1 (±6.0)  25.3 (±3.7)  69.1 (±25.2)  112.3 (±30.6) | 17 (11.8)  40.8 (±10.7)  23.5 (±5.8)  37.2 (±5.5)  21.5 (±3.4)  57.9 (±15.3)  96.4 (±27.8) | 1.93 (0.76 – 4.87)  31.7 (26.3 – 37.1)  19.9 (17.7 – 22.1)  4.9 (2.9 – 6.9)  3.8 (2.6 – 5.0)  11.2 (2.7 – 19.7)  15.9 (5.7 – 26.0) | 0.16  **<0.001**  **<0.001**  **<0.001**  **<0.001**  **0.011**  **0.002** |
| Outcomes  AF  Ischemic stroke recurrence | 8 (20.5)  8 (20.5) | 6 (4.1)  11 (7.5) | 6.02 (1.95 – 18.60)  3.17 (1.18 – 8.53) | **0.002**  **0.033** |

Abbreviations: AF – atrial fibrillation; eGFR – estimated glomerular filtration rate; ESUS – embolic stroke of undetermined source; ICM – implantable cardiac monitor; LA – left atrium; LDL-c – low density lipoprotein cholesterol; LVEDVi – left ventricular end-diastolic volume index; LVEF – left ventricular ejection fraction; LVMi – left ventricular mass index; TIA – transient ischemic attack
